# Supplementary material for: Antibiotic Use: A Cross-Sectional Study Evaluating the Understanding, Usage and Perspectives of Medical Students and Pathfinders of a Public Defence University in Malaysia
Source: Antibiotics (Basel). 2019 Sep 19;8(3):154. doi: 10.3390/antibiotics8030154 (PMC6784178; doi:10.3390/antibiotics8030154)
Supplement: Supplementary file 1 [file antibiotics-08-00154-s001.pdf]

## Appendix A

Questionnaire Regarding Antibiotic Use: A Cross-Sectional Study Evaluating the Understanding, Usage and Perspectives of Medical Students and Pathfinders of a Public Defence University in Malaysia

### First Part: Demographic Data

- 1–Year of birth  
1a–Age  
2–Gender: M      F  
3–Place of birth (Country) \_\_\_\_\_  
4–Place of birth of the father (Country) \_\_\_\_\_  
5–Place of birth of the mother (Country) \_\_\_\_\_  
6–Does at least one member of your family (parents, children, husband/wife) work in a health-related field?  
☐ yes  
☐ no  
7–Year of Study: 1/2/3/4/5  
8–Session:  
9–Ethnic Group:  
10–Marital Status: Married/Unmarried/Divorce  
11–Grade of Obtained in either Last Professional/Semester:  
12–Are you a Cadet Officer/Territorial Army/Civil Student?

### Second Part: Frequency of Antibiotic Use

- 7–Have you used antibiotics in the last year?  
☐ yes  
☐ no  
8–If yes, how many times?  
☐ 1–2  
☐ 3–5  
☐ >5

### Third Part: Knowledge about Antibiotics

9–Penicillin or Amoxicillin are antibiotics.

| 1                  | 2 | 3 | 4               |
|--------------------|---|---|-----------------|
| Total disagreement |   |   | Total agreement |

10–Aspirin is an antibiotic.

| 1                  | 2 | 3 | 4               |
|--------------------|---|---|-----------------|
| Total disagreement |   |   | Total agreement |

11–Paracetamol is an antibiotic.

| 1                  | 2 | 3 | 4               |
|--------------------|---|---|-----------------|
| Total disagreement |   |   | Total agreement |

12–Antibiotics are useful for bacterial infections (e.g., Tuberculosis).

| 1                  | 2 | 3 | 4               |
|--------------------|---|---|-----------------|
| Total disagreement |   |   | Total agreement |

13–Antibiotics are useful for viral infections (e.g., flu).

| 1                  | 2 | 3 | 4               |
|--------------------|---|---|-----------------|
| Total disagreement |   |   | Total agreement |

14–Antibiotics are indicated to reduce any kind of pain and inflammation.

| 1                  | 2 | 3 | 4               |
|--------------------|---|---|-----------------|
| Total disagreement |   |   | Total agreement |

15–Antibiotics can kill “good bacteria” present in our organism.

| 1                  | 2 | 3 | 4               |
|--------------------|---|---|-----------------|
| Total disagreement |   |   | Total agreement |

16–Antibiotics can cause secondary infections after killing good bacteria present in our organism

|                                              |                    |          |                 |          |
|----------------------------------------------|--------------------|----------|-----------------|----------|
|                                              | <b>1</b>           | <b>2</b> | <b>3</b>        | <b>4</b> |
|                                              | Total disagreement |          | Total agreement |          |
| 17–Antibiotics can cause allergic reactions. |                    |          |                 |          |
|                                              | <b>1</b>           | <b>2</b> | <b>3</b>        | <b>4</b> |
|                                              | Total disagreement |          | Total agreement |          |

#### Fourth Part: Awareness about Antibiotic Resistance

18–Have you ever heard about antibiotic resistance?

- ☐ yes  
☐ no

19–In particular, have you discussed the problem of antibiotic resistance during degree courses?

- ☐ yes  
☐ no

20–Have you ever heard of it outside degree courses? If yes, where have you heard it from?

(More than one answer is possible)

- ☐ I have never heard about it outside a degree course  
☐ General Practitioner  
☐ Television  
☐ Newspaper  
☐ Web  
☐ Other \_\_\_\_\_

21–Antibiotic resistance is a phenomenon for which a bacterium loses its sensitivity to an antibiotic.

|  |                    |          |                 |          |
|--|--------------------|----------|-----------------|----------|
|  | <b>1</b>           | <b>2</b> | <b>3</b>        | <b>4</b> |
|  | Total disagreement |          | Total agreement |          |

22–Misuse of antibiotics can lead to a loss of sensitivity of an antibiotic to a specific pathogen.

|  |                    |          |                 |          |
|--|--------------------|----------|-----------------|----------|
|  | <b>1</b>           | <b>2</b> | <b>3</b>        | <b>4</b> |
|  | Total disagreement |          | Total agreement |          |

23–If symptoms improve before it is completed the full course of antibiotic, you can stop taking it.

|  |                    |          |                 |          |
|--|--------------------|----------|-----------------|----------|
|  | <b>1</b>           | <b>2</b> | <b>3</b>        | <b>4</b> |
|  | Total disagreement |          | Total agreement |          |

#### Fifth Part: Attitudes Regarding Consumption of Antibiotics

24–Do you usually take antibiotics for the cold or a sore throat?

- ☐ yes  
☐ no

25–Do you usually take antibiotics for fever?

- ☐ yes  
☐ no

26–Do you usually stop taking antibiotics when you start feeling better?

- ☐ yes  
☐ no

27–Do you take antibiotic only when prescribed by the doctor?

- ☐ yes  
☐ no

28–Do you keep leftovers antibiotics at home because they might be useful in the future?

- ☐ yes  
☐ no

29–Do you use leftovers antibiotics when you have cold, sore throat or flu without consulting your doctor?

- ☐ yes  
☐ no

30–Do you buy antibiotics without a medical receipt?

- ☐ yes  
☐ no

31–Have you ever started an antibiotic therapy after a simple doctor call, without a proper medical examination?

- ☐ yes
- ☐ no
